# Supplementary material
Source: PubMed Central journal article supplement (PMC5161681)

**Online Resource Figure 1.** Bland-Altman Plots for principle human milk LC-PUFA and n-6/n-3 fatty acid ratios. The fatty acid data from both methods was evaluated for the agreement and the average discrepancy (the bias) between the two methods. (A-C) The methods have narrow 95% limit of agreement ranges for ARA, DHA, and EPA (dotted lines), and the values are evenly distributed along the mean line (solid line). Overall bias between the two methods, denoted by amplitude of the mean line, was centered on zero and indicates tight method agreement. (D-F) Method agreement was good for HM n-6/n-3 fatty acid ratios with very little proportional bias for ARA/EPA+DHA (F), however, a positive trend exists for the total  $\omega$ -6/ $\omega$ -3 and LA/ALA ratios (D and E) that is proportional to the magnitude of measures (x-axis), indicating the method bias becomes greater as these ratios increase.

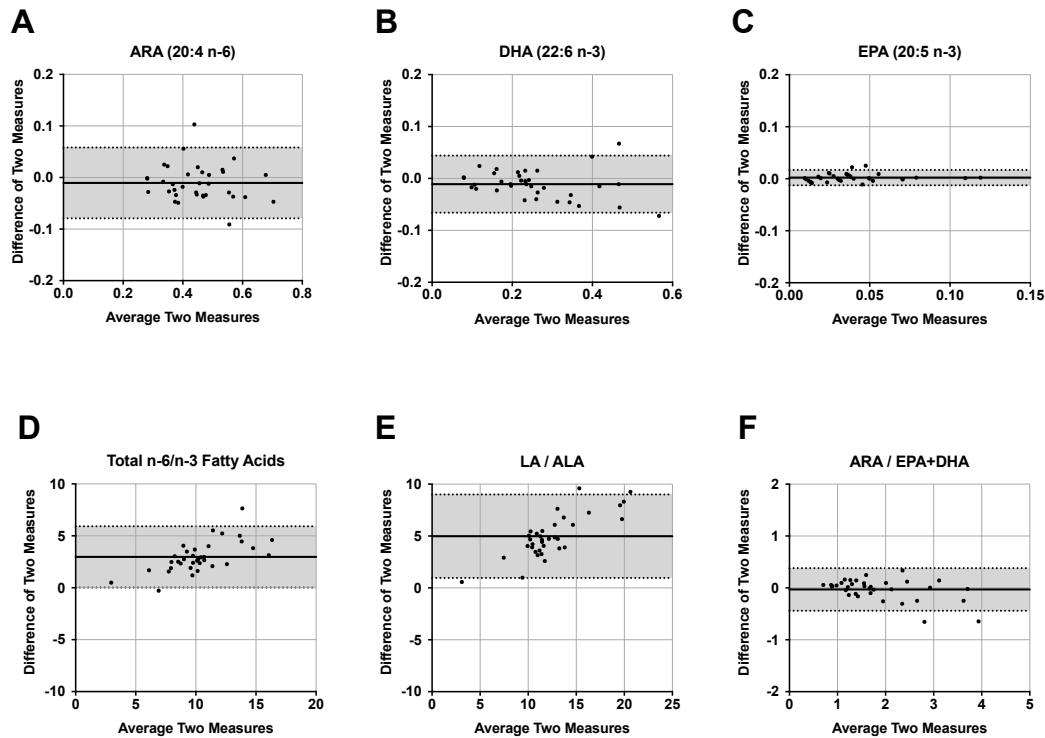

Supplement: NIHMS826343-supplement-10911_2016_9365_MOESM1_ESM.pdf [file NIHMS826343-supplement-10911_2016_9365_MOESM1_ESM.pdf]
