# Supplementary material
Source: PubMed Central journal article supplement (PMC5161681)
Supplement: NIHMS826343-supplement-10911_2016_9365_MOESM3_ESM.pdf [file NIHMS826343-supplement-10911_2016_9365_MOESM3_ESM.pdf]

**Online Resource Table 1. Deming regression equations relating human milk fatty acids using the liquid-GCMS and DMS-GCFID methods (n = 35).**

| Analyte or ratio       | 95% CI       | Equation                     | Slope +/- sd         | y-intercept +/- sd        |
|------------------------|--------------|------------------------------|----------------------|---------------------------|
| ARA (20:4 n-6)         | 0.92 to 1.17 | $Y = 1.048 * X - 0.01058$    | $1.048 \pm 0.06198$  | $-0.01058 \pm 0.02821$    |
| DHA (22:6 n-3)         | 0.97 to 1.15 | $Y = 1.061 * X - 0.004108$   | $1.061 \pm 0.04161$  | $-0.004108 \pm 0.01147$   |
| EPA (20:5 n-3)         | 0.86 to 1.07 | $Y = 0.9673 * X - 0.0007858$ | $0.9673 \pm 0.05088$ | $-0.0007858 \pm 0.002445$ |
| LA (18:2 n-6)          | 0.92 to 1.17 | $Y = 1.049 * X + 3.066$      | $1.049 \pm 0.05867$  | $3.066 \pm 0.8616$        |
| ALA (18:3 n-3)         | 1.38 to 1.69 | $Y = 1.532 * X + 0.3540$     | $1.532 \pm 0.07245$  | $0.3540 \pm 0.08599$      |
| Total n-6/n-3          | 0.57 to 0.79 | $Y = 0.6816 * X + 0.7846$    | $0.6816 \pm 0.05305$ | $0.7846 \pm 0.6486$       |
| LA/ALA                 | 0.53 to 0.69 | $Y = 0.6121 * X + 0.8207$    | $0.6121 \pm 0.03962$ | $0.8207 \pm 0.6169$       |
| AA/EPA+DHA             | 1.04 to 1.21 | $Y = 1.122 * X - 0.1932$     | $1.122 \pm 0.04286$  | $-0.1932 \pm 0.08548$     |
| Palmitic (16:0)        | 0.66 to 1.41 | $Y = 1.037 * X - 1.168$      | $1.037 \pm 0.1824$   | $-1.168 \pm 4.116$        |
| Oleic (18:1 n-9)       | 0.98 to 2.34 | $Y = 1.666 * X - 29.69$      | $1.666 \pm 0.3300$   | $-29.69 \pm 10.73$        |
| Stearic (18:0)         | 0.75 to 0.96 | $Y = 0.8587 * X + 0.1796$    | $0.8587 \pm 0.05026$ | $0.1796 \pm 0.3257$       |
| Palmitoleic (16:1 n-7) | 1.93 to 3.75 | $Y = 2.844 * X - 1.467$      | $2.844 \pm 0.4452$   | $-1.467 \pm 1.018$        |
